# Supplementary material for: Hsa_circ_0000994 Inhibits Pancreatic Cancer Progression by Clearing Immune-Related miR-27a and miR-27b
Source: Hindawi journal article supplement (doi:10.1155/2022/7274794), 2022-05-27

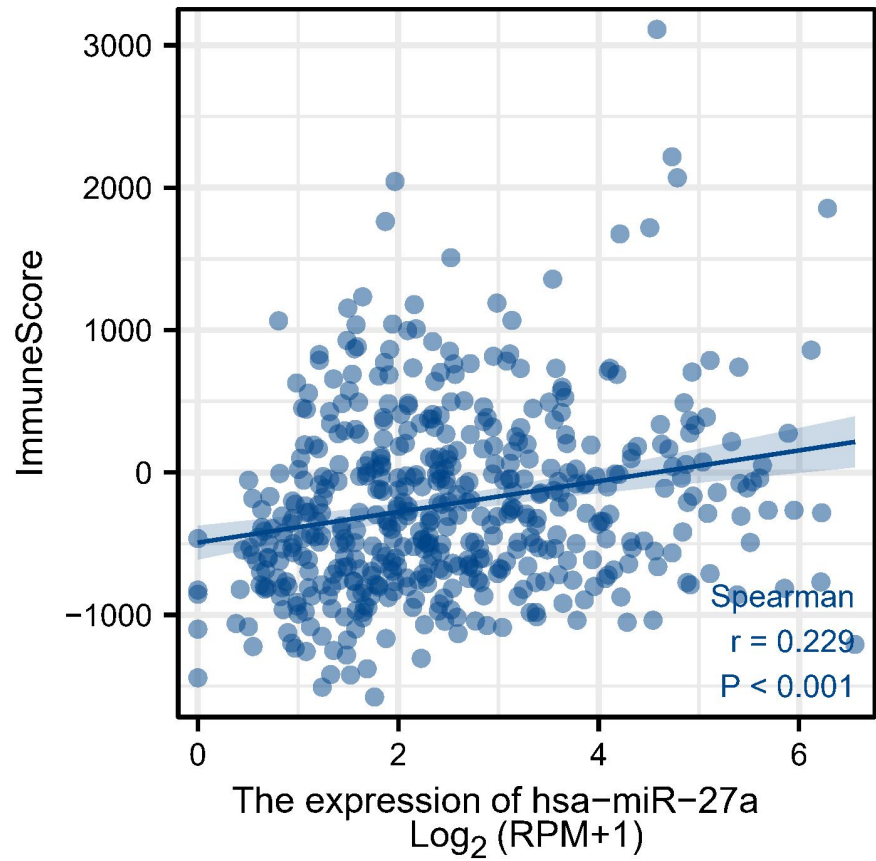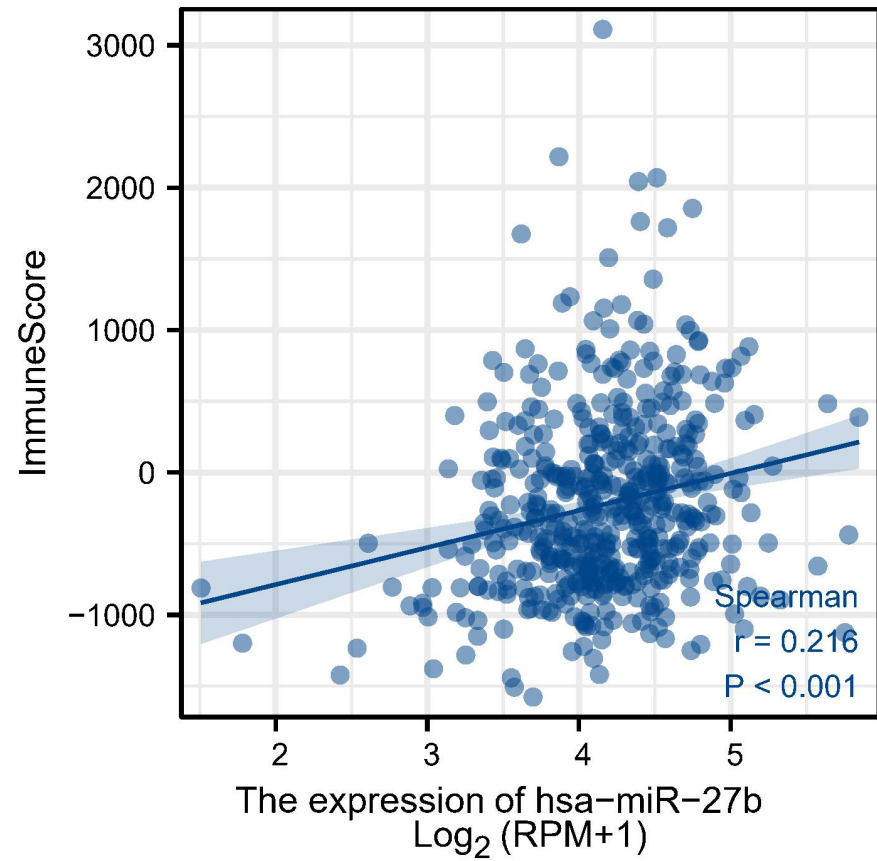

Supplement: f1 [file 7274794.f1.pdf]
